# Supplementary material
Source: publisher figshare collection journal article supplement (https://acs.figshare.com/ndownloader/files/11864153)

## Supporting Information

# Tracking of Engineered Bacteria *In Vivo* Using Non-Standard Amino Acid Incorporation

### Authors:

Pichet Praveschotinunt,<sup>\*1,2</sup> Noémie-Manuelle Dorval Courchesne,<sup>\*1,3</sup> Ilona den Hartog,<sup>†1,4,5</sup> Chaochen Lu,<sup>†1,6,7,8</sup>, Jessica J. Kim<sup>9</sup>, Peter Q. Nguyen,<sup>1</sup> Neel S. Joshi<sup>\*\*1,2</sup>

<sup>\*,†</sup>These authors contributed equally.

<sup>\*\*</sup>Corresponding author and lead contact

### Affiliations:

<sup>1</sup> Wyss Institute for Biologically Inspired Engineering, Harvard University, Boston, MA, United States

<sup>2</sup> John A. Paulson School of Engineering and Applied Sciences, Harvard University, Cambridge, MA, United States

<sup>3</sup> Department of Chemical Engineering, McGill University, Montréal, Québec, Canada

<sup>4</sup> Laboratory of Chemical Biology and Institute of Complex Molecular Systems, Department of Biomedical Engineering, Eindhoven University of Technology, Eindhoven, The Netherlands

<sup>5</sup> Division of Systems Biomedicine and Pharmacology, Leiden Academic Centre for Drug Research, Leiden University, Leiden, The Netherlands

<sup>6</sup> Dr. von Hauner Children's Hospital, Munich, Germany

<sup>7</sup> Medical center of the University of Munich, Munich, Germany

<sup>8</sup> Ludwig Maximilians University, Munich, Germany

<sup>9</sup> Harvard College, Harvard University, Cambridge, MA, United States

|         |     |                                                            |
|---------|-----|------------------------------------------------------------|
| wtCsgA  | 1   | MKLLKVAATAAIVFSGSALAGVVPQYGGGNHGGGNNSGPNSELNIYQYGGGNSALALQ |
| mutCsgA | 1   | MKLLKVAATAAIVFSGSALAGVVPQYGGGNHGGGNNSGPNSELNIYQYGGGNSALALQ |
|         |     |                                                            |
| wtCsgA  | 61  | TDARNSDLTITQHGGGNGADVGGSDSSIDLTQRGFGNSATLDQWNGKNSEMTVKQFGG |
| mutCsgA | 61  | TDARNSDLTITQHGGGNGADVGGSDS-IDLTQRGFGNSATLDQWNGKNSEMTVKQFGG |
|         |     |                                                            |
| wtCsgA  | 121 | NGAAVDQTASNSSVNVTVQVFGNNATAHQYSGSGSGSGSGSGHHHHHH           |
| mutCsgA | 120 | NGAAVDQTASNSSVNVTVQVFGNNATAHQYSGSGSGSGSGSGHHHHHH           |

**Supplementary figure 1.** Protein sequences of wild type CsgA and mutant CsgA, which contains an amber stop codon (UAG) for the incorporation of non-standard amino acid.

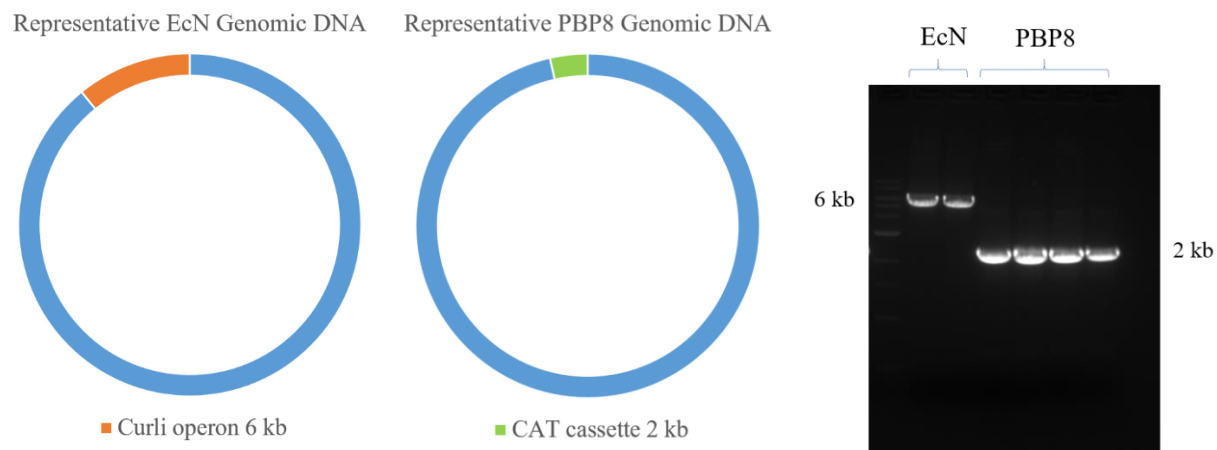

**Supplementary figure 2.** Curli operon deletion of *E. coli* Nissle 1917 (left panel) representative genomic DNA of EcN with curli operon labeled in orange (middle panel) representative genomic DNA of PBP8 with chloramphenicol acetyl transferase (CAT) cassette labeled in green replacing curli operon (right panel) DNA gel shift assay verifying the change of curli operon into CAT cassette by PCR amplification of the sequence adjacent to the curli operon in EcN and PBP8 genomic DNA

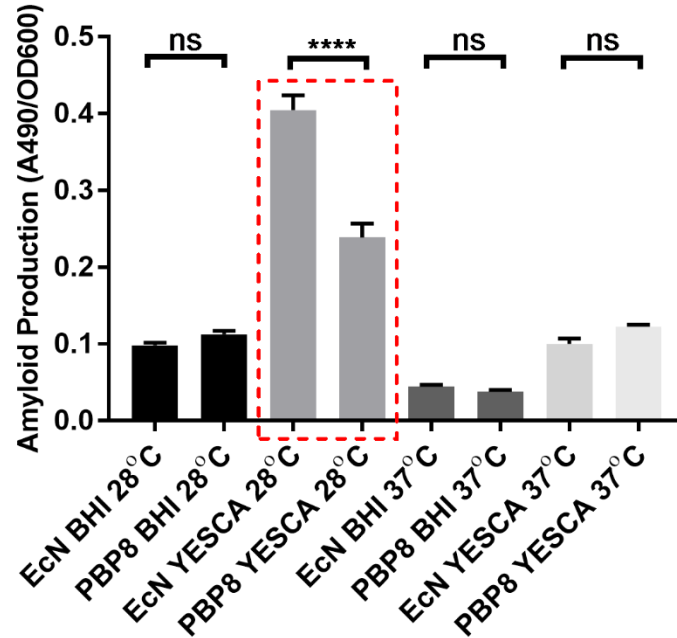

**Supplementary figure 3.** Confirmation of curli production deficiency in PBP8 cells. EcN and PBP8 cells were grown using brain heart infusion (BHI) media (high osmolarity) and YESCA media (low osmolarity) at 28°C (low temperature) and 37°C. It is known that EcN produces curli fibers when grown in low osmolarity media at low temperature. Hence, we observe the high production at YESCA 28°C. However, with the PBP8 strain, the curli operon is deleted. Therefore, we observe significant reduction in the amyloid production under this condition.

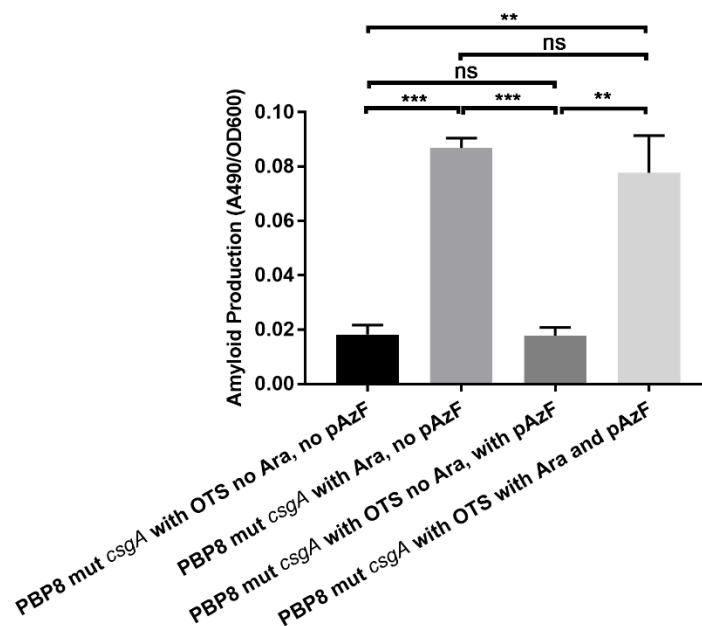

**Supplementary figure 4.** Amyloid production assay for PBP8 mut *csgA* strain with various induction conditions (Ara = L-arabinose, pAzF = *p*-azido-L-phenylalanine)

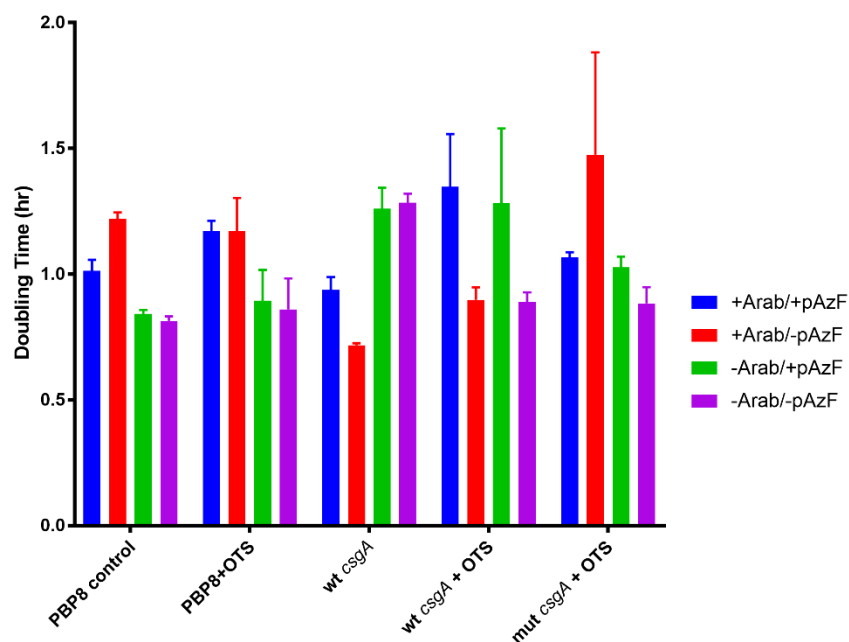

**Supplementary figure 5.** Doubling time comparison of PBP8 variants across different types of induction conditions.

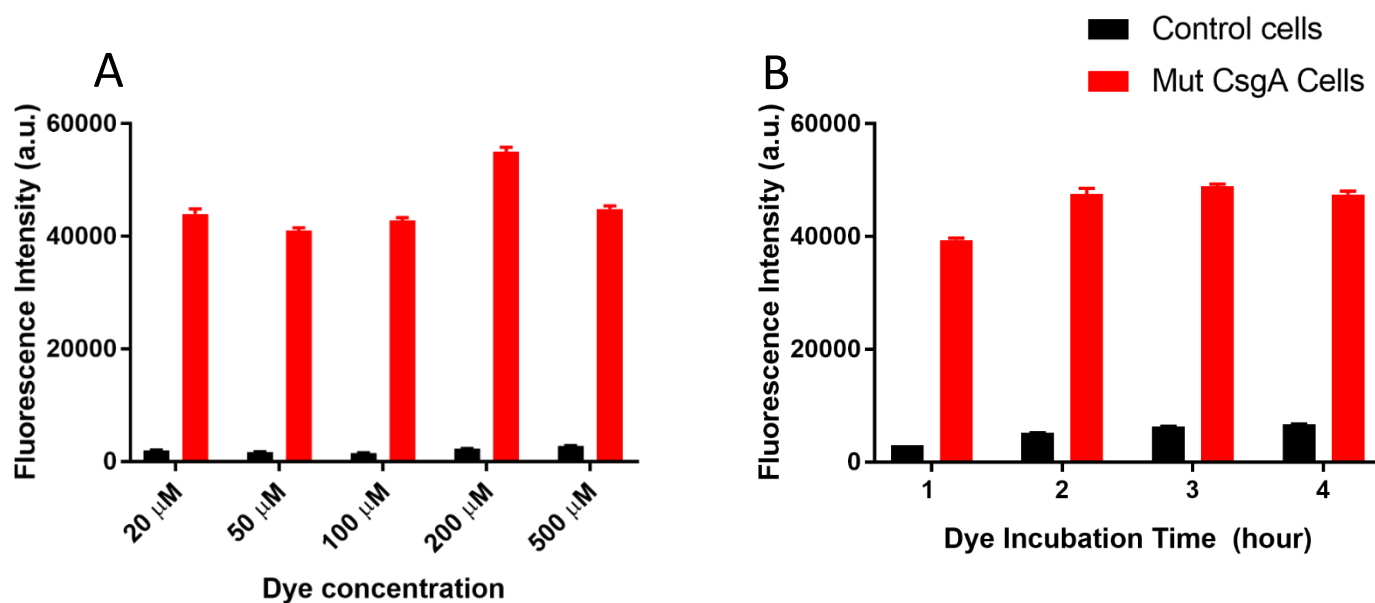

**Supplementary figure 6.** (A) Fluorescence intensity after labeling of PBP8 cells (grey) and mut CsgA cells (red) as a function of Cy5-DBCO concentration (B) Fluorescence intensity after labeling of PBP8 cells (grey) and mut CsgA cells (red) as a function of incubation time with Cy5-DBCO.

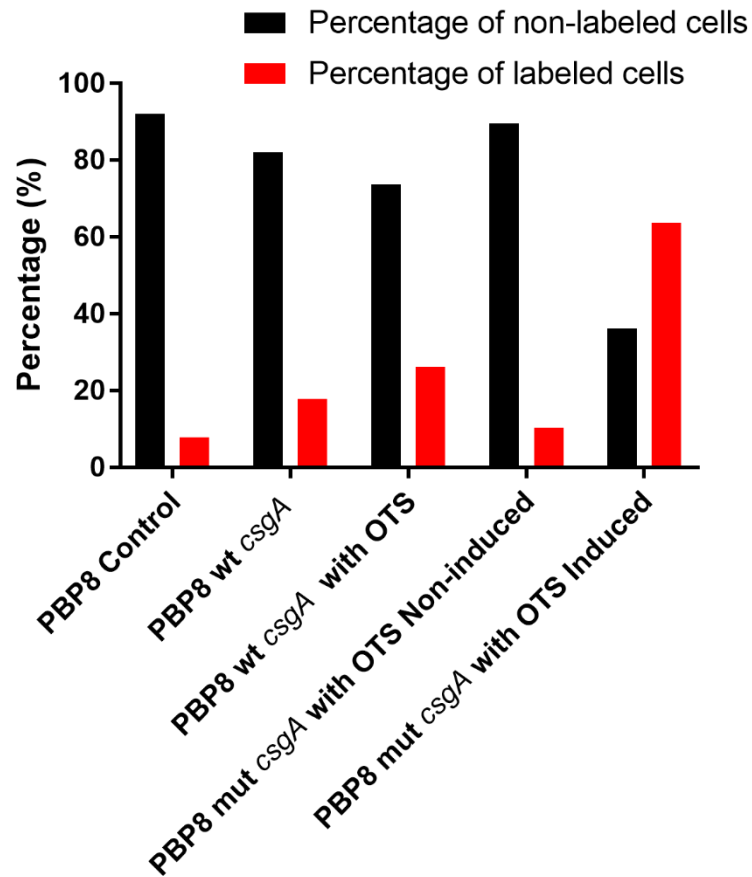

**Supplementary figure 7.** Percentage of non-labeled and labeled PBP8 cells as interpreted by flow cytometry data.

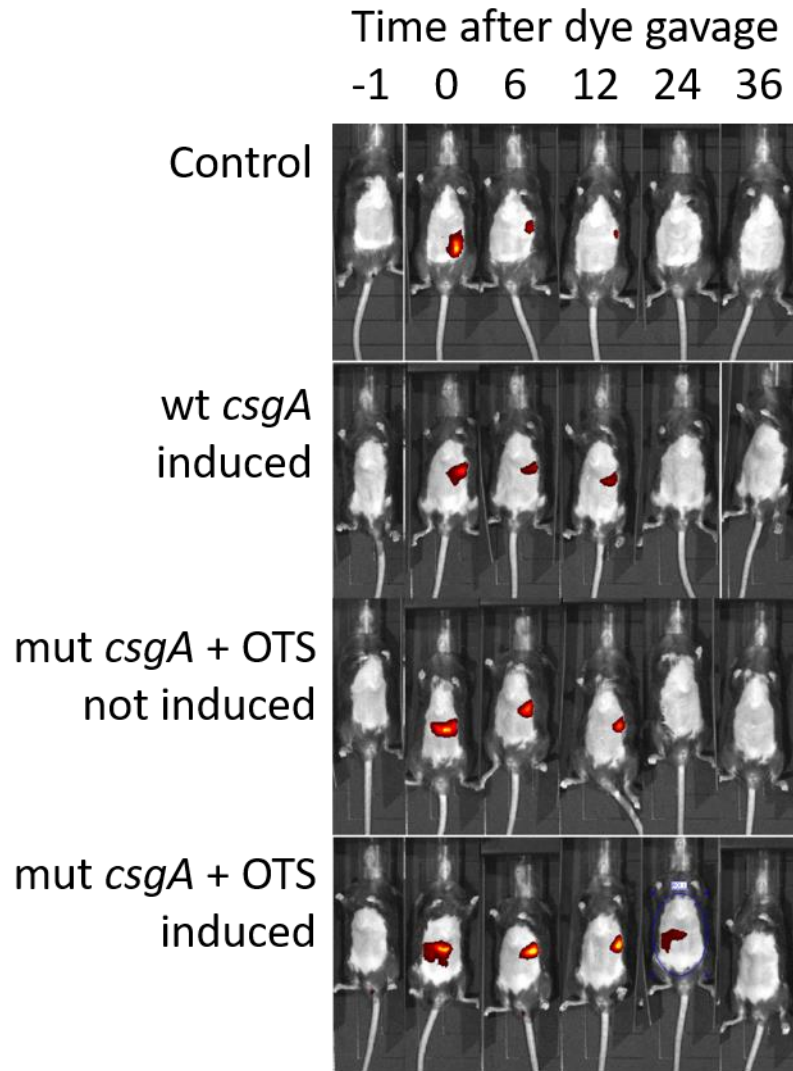

**Supplementary figure 8.** Auto-fluorescence of the *in vivo* mouse imaging.

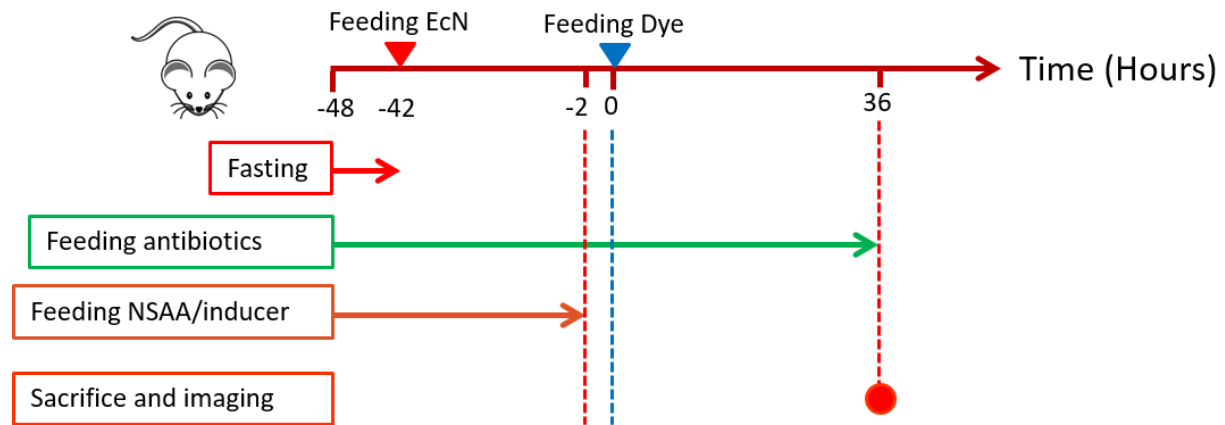

**Supplementary figure 9.** Mouse experiment timing illustration.

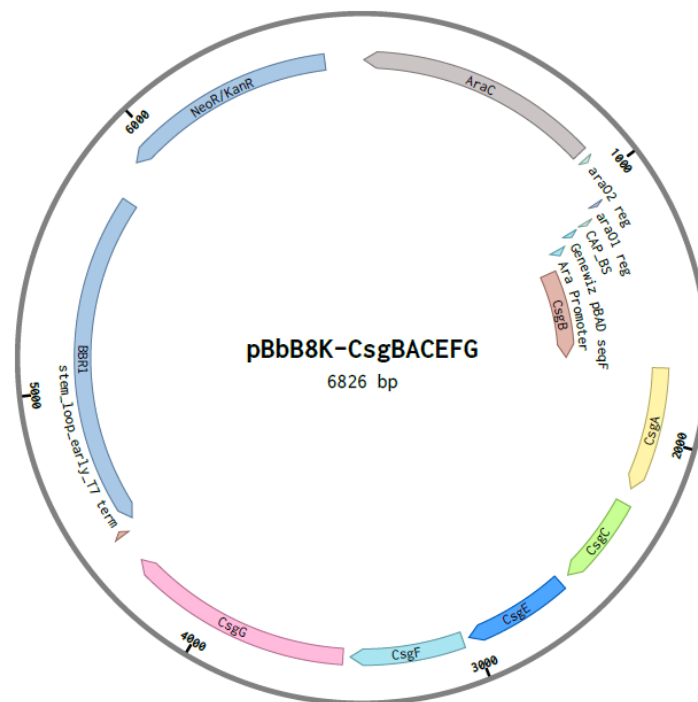

**Supplementary figure 10.** pBbB8k-wt *csgA* plasmid map.

Supplementary information 1. wt *csgA* sequences

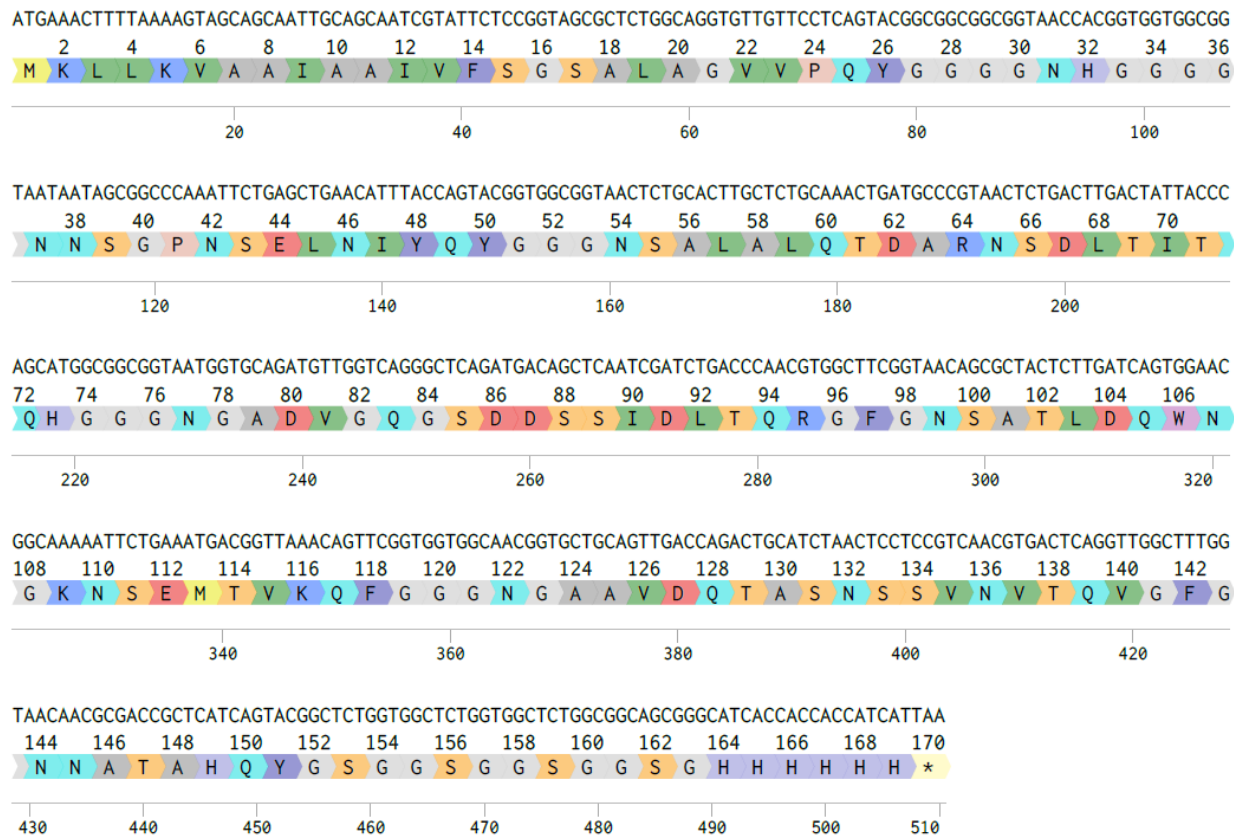



Supplementary information 2. mut *csgA* sequences

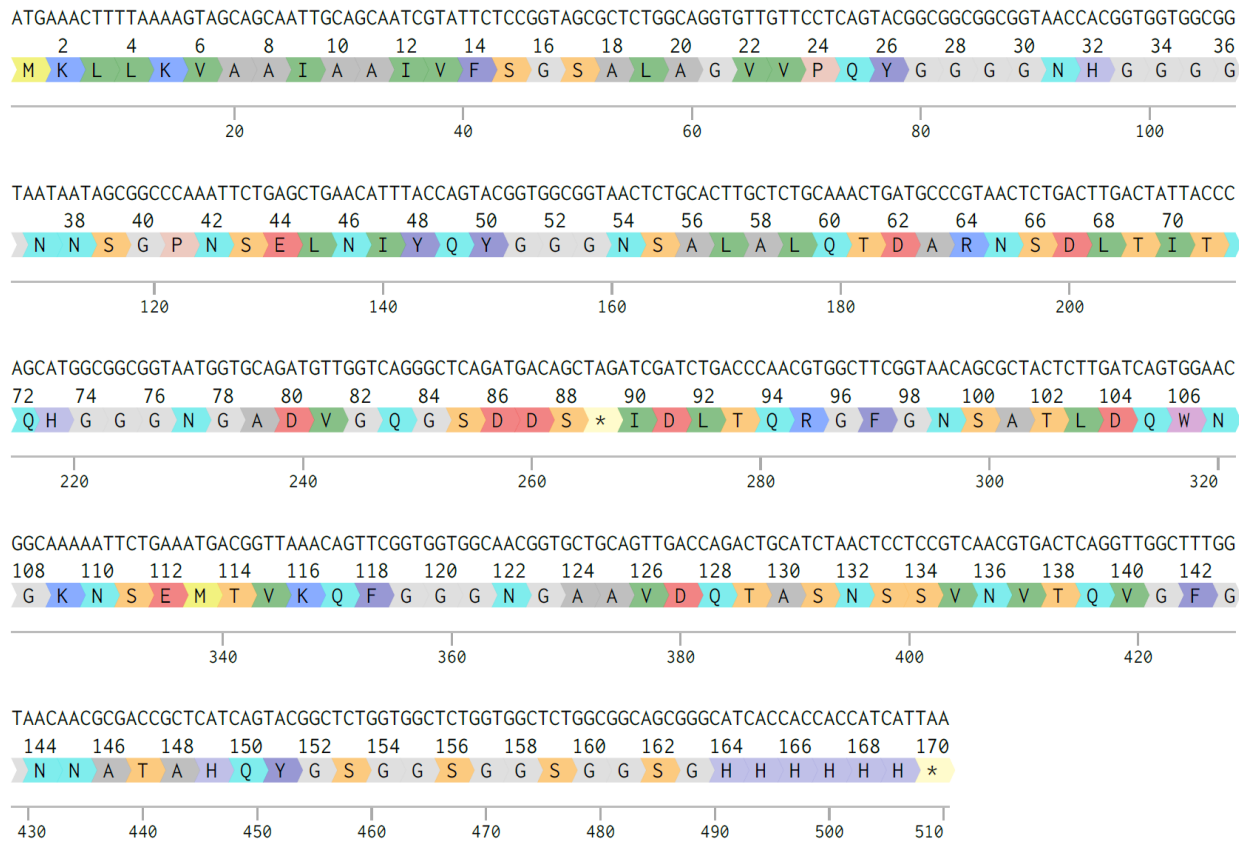

Supplement: Supplementary file 1 [file 11864153]
